# Supplementary material for: Global computational alignment of tumor and cell line transcriptional profiles
Source: PubMed Central journal article supplement (PMC7782593; doi:10.1038/s41467-020-20294-x), 2021-01-04
Supplement: 41467_2020_20294_MOESM3_ESM.pdf [file 41467_2020_20294_MOESM3_ESM.pdf]

### **Description of Additional Supplementary Files**

File Name: Supplementary Data 1

Description: Provides a list of all samples (tumors and cell lines) used in this analysis, and relevant metadata (lineage, subtype, UMAP coordinates, etc.).

File Name: Supplementary Data 2

Description: List of differentially expressed genes used in mutual nearest neighbors batch correction.
